# Supplementary material for: Comprehensive analysis of endoplasmic reticulum stress-associated genes signature of ulcerative colitis
Source: Front Immunol. 2023 May 23;14:1158648. doi: 10.3389/fimmu.2023.1158648 (PMC10243217; doi:10.3389/fimmu.2023.1158648)
Supplement: Supplementary Table 2 — The results of the Cmap dataset. [file Table_2.xlsx]

## Sheet: clue_result
Score	inhibitors	target_count	MOA
-99.89	CG-930	1	JNK inhibitor
-99.89	rufloxacin	0	Bacterial DNA gyrase inhibitor
-99.89	lapatinib	3	EGFR inhibitor, ErbB2 inhibitor
-99.86	PNU-120596	1	Acetylcholine receptor agonist
-99.79	diazepam	22	Benzodiazepine receptor agonist
-99.75	FG-7142	0	GABA benzodiazepine site receptor inverse agonist
-99.72	resveratrol	12	Cytochrome P450 inhibitor, SIRT activator
-99.72	triacsin-c	1	Adrenergic receptor antagonist
-99.65	actarit	0	Interleukin receptor agonist
-99.65	L-161982	1	Prostanoid receptor antagonist, Angiotensin receptor antagonist
-99.56	JAK3-inhibitor-I	1	JAK inhibitor
-99.51	UNC-0321	1	Histone lysine methyltransferase inhibitor
-99.5	acetyl-geranygeranyl-cysteine	0	Inhibitor of methyl esterification of geranylgeranylated proteins
-99.44	trioxsalen	0	DNA synthesis inhibitor
-99.4	fatostatin	2	SREBP inhibitor
-99.4	pirinixic-acid	1	PPAR receptor agonist
-99.3	ascorbyl-palmitate	0	antioxidant
-99.26	AS-703026	2	MEK inhibitor
-99.26	guaifenesin	0	Expectorant
-99.26	phensuximide	0	Succinimide antiepileptic
-99.24	testosterone	5	Androgen receptor agonist
-99.22	sinensetin	0	Cyclooxygenase inhibitor
-99.22	PD-98059	17	MEK inhibitor, MAP kinase inhibitor
-99.19	doxercalciferol	1	Vitamin D receptor agonist
-99.19	desoxypeganine	2	Acetylcholinesterase inhibitor, Monoamine oxidase inhibitor
-99.12	diethylstilbestrol	4	Estrogen receptor agonist
-99.08	megestrol	1	progesterone receptor agonist
-99.05	GW-843682X	2	PLK inhibitor
-98.96	benzanthrone	0	Aromatic hydrocarbon derivative
-98.94	memantine	8	Glutamate receptor antagonist
-98.84	pinocembrin	4	CYP1B1 inhibitor
-98.77	sitagliptin	5	Dipeptidyl peptidase inhibitor
-98.73	hydrocortisone	4	Glucocorticoid receptor agonist
-98.72	nikkomycin	0	Chitin inhibitor
-98.7	noscapine	2	Bradykinin receptor antagonist, Tubulin inhibitor
-98.66	fenbendazole	5	Tubulin inhibitor
-98.66	albendazole	5	Anthelmintic, Tubulin inhibitor
-98.59	U-74389F	0	Lipid peroxidase inhibitor
-98.56	17-hydroxyprogesterone-caproate	4	progesterone receptor agonist
-98.56	LY-303511	4	Casein kinase inhibitor, MTOR inhibitor, PI3K inhibitor
-98.53	carbamazepine	6	Carboxamide antiepileptic
-98.48	phenacetin	1	Cyclooxygenase inhibitor
-98.45	orantinib	9	FGFR inhibitor, VEGFR inhibitor, PDGFR receptor inhibitor
-98.45	alpha-linolenic-acid	8	Omega 3 fatty acid stimulant
-98.41	retinyl	0	vitamin analog
-98.36	PD-0325901	2	MEK inhibitor, MAP kinase inhibitor, Protein kinase inhibitor
-98.34	taurocholic-acid	5	Bile acid
-98.34	tacrolimus	3	Calcineurin inhibitor
-98.31	propantheline	4	Acetylcholine receptor antagonist
-98.3	T-0070907	1	PPAR receptor antagonist
-98.23	huperzine-a	1	Acetylcholinesterase inhibitor
-98.23	auraptene	1	Nitric oxide production inhibitor
-98.17	ranolazine	4	Sodium channel blocker
-98.17	griseofulvin	1	Tubulin inhibitor
-98.17	fluocinonide	3	Glucocorticoid receptor agonist
-98.13	flubendazole	1	Tubulin inhibitor
-98.1	avrainvillamide-analog-3	1	nucleophosmin inhibitor
-98.06	QL-XI-92	1	DDR1 inhibitor
-98.04	citalopram	2	Serotonin reuptake inhibitor
-98.03	GANT-58	3	GLI antagonist
-97.99	TG100-115	4	-666
-97.99	ML-3163	5	p38 MAPK inhibitor
-97.99	fluocinolone	2	Glucocorticoid receptor agonist, Corticosteroid agonist
-97.95	epitestosterone	3	Inactive testosterone analog
-97.94	flecainide	4	Sodium channel blocker
-97.89	depomedrol	0	Glucocorticoid receptor agonist
-97.89	ALW-II-38-3	6	Ephrin inhibitor
-97.87	pravastatin	2	HMGCR inhibitor
-97.74	fluticasone	6	Glucocorticoid receptor agonist
-97.74	rilmenidine	1	Adrenergic receptor agonist, Imidazoline receptor agonist
-97.68	PD-173074	9	FGFR inhibitor, VEGFR inhibitor
-97.65	BML-257	1	AKT inhibitor, HCV inhibitor
-97.64	fluocinonide	3	Glucocorticoid receptor agonist
-97.59	bucladesine	1	Adenosine receptor agonist, cAMP stimulant
-97.57	IWR-1-ENDO	2	PARP inhibitor
-97.57	desoxycortone	2	Mineralocorticoid receptor agonist
-97.52	felodipine	14	Calcium channel blocker
-97.5	desoximetasone	2	Glucocorticoid receptor agonist
-97.48	diethylcarbamazine	2	Lipoxygenase inhibitor
-97.46	naproxol	2	Anti-inflammatory
-97.43	RO-19-4605	4	GABA benzodiazepine site receptor inverse agonist
-97.36	ON-01910	8	PLK inhibitor
-97.36	TPCA-1	1	IKK inhibitor
-97.32	fluoropyruvate	0	Pyruvate dehydrogenase kinase inhibitor
-97.32	droxinostat	2	HDAC inhibitor
-97.29	CAY-10577	0	Casein kinase inhibitor
-97.18	doxylamine	2	Histamine receptor antagonist
-97.18	carbetocin	1	Oxytocin receptor agonist
-97.13	RO-60-0175	3	Serotonin receptor agonist
-97.1	escitalopram	7	Selective serotonin reuptake inhibitor (SSRI)
-96.97	oxalomalic-acid	2	Isocitrate dehydrogenase inhibitor
-96.89	tipifarnib	2	Farnesyltransferase inhibitor
-96.86	prunetin	2	Breast cancer resistance protein inhibitor
-96.76	SB-206553	4	Serotonin receptor antagonist
-96.72	cholic-acid	20	Bile acid
-96.72	neurodazine	0	Neurogenesis of non-pluripotent C2C12 myoblast inducer
-96.66	nicotine	17	Acetylcholine receptor agonist
-96.57	tadalafil	2	Phosphodiesterase inhibitor
-96.49	atorvastatin	5	HMGCR inhibitor
-96.48	beclometasone	4	Glucocorticoid receptor agonist
-96.48	alosetron	1	Serotonin receptor antagonist
-96.48	lamivudine	0	Nucleoside reverse transcriptase inhibitor
-96.46	halometasone	1	Glucocorticoid receptor agonist
-96.43	betamethasone	1	Glucocorticoid receptor agonist, Anti-inflammatory
-96.34	TCS-359	1	FLT3 inhibitor
-96.34	selumetinib	2	MEK inhibitor
-96.34	MK-1775	1	WEE1 kinase inhibitor
-96.31	rizatriptan	5	Serotonin receptor agonist
-96.28	PD-169316	1	p38 MAPK inhibitor
-96.25	PD-184352	4	MEK inhibitor
-96.13	formoterol	2	Adrenergic receptor agonist
-96.13	tocainide	1	Sodium channel blocker
-96.05	chloroquine	5	Antimalarial
-96.02	amoxapine	44	Norepinephrine reuptake inhibitor
-96.01	clofibrate	2	PPAR receptor agonist
-96	valproic-acid	21	HDAC inhibitor
-95.95	danoprevir	0	HCV inhibitor
-95.94	androstenol	1	GABA receptor modulator
-95.93	beta-CCP	3	Indoleamine 2,3-dioxygenase inhibitor
-95.84	fluticasone	6	Glucocorticoid receptor agonist
-95.82	tyrphostin-AG-112	1	Protein tyrosine kinase inhibitor
-95.74	PNU-282987	1	Cholinergic receptor agonist
-95.62	brompheniramine	6	Histamine receptor antagonist
-95.6	clocortolone	2	Glucocorticoid receptor agonist, Steroid
-95.6	aspirin	19	Cyclooxygenase inhibitor
-95.56	niridazole	0	Phosphofructokinase inhibitor
-95.55	WAY-213613	1	Glutamate inhibitor
-95.55	PJ-34	4	PARP inhibitor
-95.52	amylocaine	0	Local anesthetic
-95.51	tyrphostin-AG-1295	4	PDGFR receptor inhibitor
-95.49	nicergoline	1	Adrenergic receptor antagonist
-95.45	vinorelbine	1	Tubulin inhibitor
-95.45	NECA	5	Adenosine receptor agonist
-95.41	mepyramine	1	Histamine receptor antagonist
-95.38	docetaxel	7	Tubulin inhibitor
-95.28	pyrazolanthrone	6	JNK inhibitor
-95.27	BAS-09104376	0	HIV integrase inhibitor
-95.25	acetyl-farnesyl-cysteine	1	Inhibitor of methylation of endogenous isoprenylated proteins
-95.18	ABT-737	3	BCL inhibitor
-95.18	NSC-23766	0	Ras GTPase inhibitor
-95.15	tropisetron	5	Serotonin receptor antagonist
-95.09	L-BSO	1	Glutathione transferase inhibitor
-95.09	GSK-429286A	1	Rho associated kinase inhibitor
-95.08	avrainvillamide-analog-5	1	nucleophosmin inhibitor
-95.05	eugenol	2	Androgen receptor antagonist
-94.96	fludrocortisone	3	Glucocorticoid receptor agonist, Mineralocorticoid receptor agonist
-94.96	fluorometholone	1	Glucocorticoid receptor agonist
-94.95	oxymetholone	1	Androgen receptor agonist
-94.86	dexamethasone	7	Glucocorticoid receptor agonist
-94.84	prednisolone	3	Glucocorticoid receptor agonist
-94.79	GR-144053	2	Integrin antagonist
-94.79	deforolimus	1	MTOR inhibitor
-94.64	rosuvastatin	1	HMGCR inhibitor
-94.61	androstenedione	3	Cytochrome P450 inhibitor
-94.61	rifapentine	2	RNA polymerase inhibitor
-94.6	nilutamide	2	Androgen receptor antagonist
-94.56	MDL-11939	3	Serotonin receptor antagonist
-94.55	iloperidone	11	Dopamine receptor antagonist, Serotonin receptor antagonist
-94.5	mupirocin	0	Isoleucyl-tRNA synthetase inhibitor
-94.46	temozolomide	1	DNA alkylating agent
-94.29	alpha-estradiol	11	Estrogen receptor agonist
-94.24	equilin	1	Estrogen receptor agonist
-94.06	W-9	1	Calmodulin antagonist
-94.05	ipriflavone	0	Bone resorption inhibitor
-93.95	ciclacillin	0	Bacterial cell wall synthesis inhibitor
-93.94	clobenpropit	4	Histamine receptor antagonist
-93.94	L-690330	1	Inositol monophosphatase inhibitor
-93.8	halcinonide	1	Glucocorticoid receptor agonist
-93.71	westcort	0	Glucocorticoid receptor agonist
-93.56	treprostinil	9	Prostacyclin analog
-93.55	SJ-172550	1	MDM inhibitor
-93.49	tropicamide	4	Acetylcholine receptor antagonist
-93.45	vemurafenib	5	RAF inhibitor
-93.37	leu-enkephalin	2	Opioid receptor agonist
-93.33	ornidazole	0	Antiprotozoal
-93.17	deferiprone	1	Chelating agent
-93.16	VU-0365114-2	1	M5 modulator
-93.12	ritanserin	12	Serotonin receptor antagonist
-92.98	warfarin	4	Vitamin K antagonist
-92.85	geldanamycin	2	HSP inhibitor
-92.84	KUC104502N	1	-666
-92.79	GSK-461364	1	PLK inhibitor
-92.77	clebopride	2	Dopamine receptor antagonist
-92.73	oxymetazoline	10	Adrenergic receptor agonist
-92.7	SRC-kinase-inhibitor-II	0	SRC inhibitor
-92.52	MEK1-2-inhibitor	2	MEK inhibitor
-92.46	I-OMe-AG-538	0	IGF-1 inhibitor
-92.45	azithromycin	1	Bacterial 50S ribosomal subunit inhibitor
-92.44	SB-205384	3	GABA receptor modulator
-92.36	tomelukast	1	Leukotriene receptor antagonist
-92.28	tyrphostin-51	0	EGFR inhibitor
-92.21	sunitinib	10	FLT3 inhibitor, KIT inhibitor, PDGFR receptor inhibitor, RET tyrosine kinase inhibitor, VEGFR inhibitor
-92.15	RHO-kinase-inhibitor-III[rockout]	2	Rho associated kinase inhibitor
-92.11	domperidone	4	Dopamine receptor antagonist
-92.05	IKK-2-inhibitor	1	IKK inhibitor, SYK inhibitor
-92.04	3-amino-benzamide	1	PARP inhibitor
-92.01	equol	2	Estrogen receptor agonist
-91.97	PP-3	0	EGFR inhibitor
-91.97	erastin	1	Ion channel antagonist
-91.79	sibutramine	6	Serotonin reuptake inhibitor
-91.77	ziprasidone	26	Dopamine receptor antagonist, Serotonin receptor antagonist
-91.65	timolol	2	Adrenergic receptor antagonist
-91.62	solanine	0	Acetylcholinesterase inhibitor
-91.49	vincristine	2	Tubulin inhibitor
-91.38	flupirtine	4	Glutamate receptor antagonist
-91.37	genistein	13	Tyrosine kinase inhibitor
-91.24	KUC103898N	0	-666
-91.23	elvitegravir	0	HIV integrase inhibitor
-91.14	rifaximin	2	RNA synthesis inhibitor
-91.06	latrepirdine	3	Glutamate receptor antagonist
-91.03	QW-BI-011	1	Histone lysine methyltransferase inhibitor
-90.99	triprolidine	1	Histamine receptor antagonist
-90.84	budesonide	3	Glucocorticoid receptor agonist
-90.69	piceid	2	ICAM1 inhibitor
-90.66	chlortetracycline	0	Protein synthesis inhibitor
-90.63	HLI-373	1	MDM inhibitor
-90.54	medrysone	1	Glucocorticoid receptor agonist
-90.47	dictamnine	0	Furoquinoline alkaloid
-90.41	MDL-29951	2	Glutamate receptor antagonist
-90.4	epoxycholesterol	2	LXR agonist
-90.37	eicosatetraynoic-acid	4	Cyclooxygenase inhibitor, Lipoxygenase inhibitor
-90.35	n-(3-acetamidophenyl)-3-chlorobenzamide	1	Glutamate receptor antagonist
-90.07	carbinoxamine	1	Histamine receptor antagonist, L-type calcium channel blocker
-90	talampicillin	0	Bacterial cell wall synthesis inhibitor
-89.97	atovaquone	1	Mitochondrial electron transport inhibitor
-89.89	epigallocatechin	16	Nitric oxide synthase inhibitor, Bacterial DNA gyrase inhibitor
-89.8	ZD-7288	4	HCN channel blocker
-89.78	parthenolide	3	NFkB pathway inhibitor
-89.77	AM-281	3	Cannabinoid receptor antagonist
-89.76	3-methyl-GABA	0	GABA aminotransferase activator
-89.63	BRL-50481	2	Phosphodiesterase inhibitor
-89.47	metyrapone	3	Cytochrome P450 inhibitor
-89.29	MDM2-inhibitor	1	MDM inhibitor
-89.2	bicuculline	7	GABA receptor antagonist
-89.16	WH-4023	3	SRC inhibitor
-89.14	doxapram	2	Potassium channel blocker
-89.12	rimexolone	2	Glucocorticoid receptor agonist
-89.08	fluconazole	2	Sterol demethylase inhibitor
-89.03	SB-590885	1	RAF inhibitor
-89	CL-218872	6	GABA receptor agonist
-88.99	LE-300	3	Dopamine receptor antagonist
-88.98	CDC	2	Lipoxygenase inhibitor
-88.97	canertinib	4	EGFR inhibitor
-88.87	ofloxacin	1	Bacterial DNA gyrase inhibitor
-88.86	7,8-dihydro-L-biopterin	2	Dihydroneopterin aldolase inhibitor
-88.83	quinisocaine	0	Local anesthetic
-88.67	ICI-199441	5	Opioid receptor agonist
-88.53	SA-792574	1	Microtubule inhibitor
-88.48	zardaverine	5	Phosphodiesterase inhibitor
-88.3	IB-MECA	4	Adenosine receptor agonist
-88.26	enobosarm	1	Androgen receptor modulator
-88.08	PD-160170	1	Neuropeptide receptor antagonist
-88.04	JX-401	1	p38 MAPK inhibitor
-87.86	MR-16728	0	Acetylcholine release enhancer, Acetylcholine release stimulant
-87.85	SB-366791	1	TRPV antagonist
-87.83	sulfacetamide	0	PABA antagonist
-87.8	evodiamine	1	ATPase inhibitor, TRPV agonist
-87.76	gefitinib	2	EGFR inhibitor
-87.67	irsogladine	1	Phosphodiesterase inhibitor
-87.41	lopinavir	0	HIV protease inhibitor
-87.34	altanserin	2	Serotonin receptor antagonist
-87.25	EMF-BCA1-64	1	Caspase inhibitor
-87.11	BRD-K41143549	0	Glutamate receptor antagonist
-87.06	farnesol	3	FXR agonist, Monoamine oxidase inhibitor, NFkB pathway activator, PPAR receptor agonist
-87.03	NSC-94258	3	Antineoplastic
-86.98	DMEOB	0	glutamate receptor modulator
-86.78	mesna	0	Antioxidant
-86.63	rivaroxaban	3	Coagulation inhibitor
-86.6	apoptosis-activator-II	2	Carboxylesterase inhibitor
-86.6	AG-370	1	PDGFR receptor inhibitor
-86.56	avrainvillamide-analog-6	1	nucleophosmin inhibitor
-86.4	VUF-5681	1	Histamine receptor antagonist
-86.32	HO-013	1	PPAR receptor agonist
-86.25	alfuzosin	4	Adrenergic receptor antagonist
-86.24	LY-320135	1	Cannabinoid receptor antagonist
-86.23	nimetazepam	4	GABA receptor agonist
-86.09	NVP-AUY922	3	HSP inhibitor
-86.02	flucytosine	1	Antifungal
-85.94	gamma-homolinolenic-acid	2	Cholesterol inhibitor, Platelet aggregation inhibitor, Prostanoid receptor agonist, Prostanoid receptor stimulant
-85.93	harpagoside	1	Acetylcholinesterase inhibitor
-85.93	tiabendazole	0	Angiogenesis inhibitor
-85.9	lobelanidine	6	Acetylcholine receptor antagonist, Dopamine receptor modulator, Opioid receptor antagonist, Vesicular monoamine transporter ligand
-85.85	tubacin	1	HDAC inhibitor
-85.83	geranylgeraniol	0	Farnesyltransferase inhibitor
-85.82	dilazep	2	Adenosine reuptake inhibitor
-85.78	coumestrol	2	Estrogen receptor agonist
-85.72	azaperone	2	Dopamine receptor antagonist
-85.69	phenprobamate	0	Muscle relaxant
-85.56	AR-C133057XX	2	Nitric oxide synthase inhibitor
-85.55	alrestatin	1	Aldose reductase inhibitor
-85.38	YM-298198	1	Glutamate receptor antagonist
-85.31	NU-7441	2	DNA dependent protein kinase inhibitor, P-glycoprotein inhibitor
-85.29	linezolid	1	Bacterial 50S ribosomal subunit inhibitor
-85.18	3,3'-diindolylmethane	5	CHK inhibitor, Cytochrome P450 activator, Indoleamine 2,3-dioxygenase inhibitor
-85.18	CPCCOEt	1	Glutamate receptor antagonist
-85.04	BAY-K8644	1	Calcium channel activator, L-type calcium channel activator
-85.01	acetyl-geranyl-cysteine	0	Isoprenylated protein methylation inhibitor
-85.01	alclometasone	2	Glucocorticoid receptor agonist, Immunosuppressant
-84.87	benzoxiquine	0	Anti-infective
-84.86	isoxsuprine	1	Adrenergic receptor agonist
-84.64	cefotiam	0	Bacterial cell wall synthesis inhibitor
-84.62	VU-0400193-3	1	Glutamate receptor modulator
-84.59	ketoconazole	7	Sterol demethylase inhibitor
-84.52	LY-255283	2	Leukotriene receptor antagonist
-84.47	pergolide	18	Dopamine receptor agonist
-84.33	7,4'-dihydroxyflavone	1	Opioid receptor antagonist
-84.3	ethambutol	0	Bacterial cell wall synthesis inhibitor
-84.3	iopanoic-acid	0	Radiopaque medium
-83.98	Cyclo-[Arg-Gly-Asp-D-Phe-Val]	2	integrin antagonist
-83.89	topiramate	27	Carbonic anhydrase inhibitor, Glutamate receptor antagonist, Kainate receptor antagonist
-83.84	cinalukast	1	Leukotriene receptor antagonist
-83.73	sunitinib	10	PLK inhibitor
-83.73	phenformin	2	AMPK activator
-83.71	chlormadinone	1	5-alpha reductase inhibitor, Progesterone receptor agonist
-83.5	danusertib	8	Aurora kinase inhibitor, Growth factor receptor inhibitor
-83.48	loreclezole	2	GABA receptor agonist
-83.42	UK-356618	5	Metalloproteinase inhibitor
-83.36	lansoprazole	4	ATPase inhibitor
-83.28	clobetasol	2	Glucocorticoid receptor agonist
-83.13	BRL-54443	2	Serotonin receptor agonist
-83.09	cosmosiin	0	Cytochrome P450 inhibitor
-83	danazol	8	Estrogen receptor antagonist, Progesterone receptor agonist
-82.89	dicycloverine	3	Acetylcholine receptor antagonist
-82.82	isoliquiritigenin	3	Guanylate cyclase activator
-82.64	JTE-907	1	Cannabinoid receptor inverse agonist
-82.64	fluperlapine	4	Serotonin receptor antagonist
-82.52	isoreserpine	3	Vesicular monoamine transporter inhibitor
-82.44	lonidamine	1	Glucokinase inhibitor
-82.39	QX-314	2	Sodium channel blocker
-82.34	guanabenz	3	Adrenergic receptor agonist
-82.22	cinnarizine	16	Calcium channel blocker
-82.18	lithocholic-acid	7	FXR antagonist, MDM inhibitor, PXR ligand, Tyrosine phosphatase inhibitor, Vitamin D receptor agonist, Vitamin D receptor ligand
-81.87	zaprinast	5	Phosphodiesterase inhibitor
-81.64	ivachtin	1	Caspase inhibitor
-81.54	phylloquinone	2	Vitamin K, Gamma carboxylase enzyme
-81.48	PCO-400	2	Potassium channel activator
-81.35	pantoprazole	3	ATPase inhibitor
-81.32	thenoyltrifluoroacetone	3	Chelating agent
-81.16	phenelzine	10	Monoamine oxidase inhibitor
-81	propofol	21	GABA receptor agonist
-80.92	levetiracetam	3	Calcium channel blocker
-80.9	zileuton	1	Leukotriene inhibitor, Lipoxygenase inhibitor
-80.83	finasteride	4	5-alpha reductase inhibitor
-80.48	metolazone	3	Carbonic anhydrase inhibitor
-80.16	seneciphylline	0	Cytochrome P450 inhibitor
-80.07	hydroflumethiazide	8	Sodium/potassium/chloride transporter inhibitor
